# Supplementary material
Source: Springer Nature journal article supplement (https://www.springermedizin.de/resource/supplementary/12913_2008_1020_MOESM1_ESM.pdf/9536152)
Supplement: MOESM1 [file 9536152]

**General project  
concept /  
rough draft**

- Defining the structure of questions
  - Preliminary study: “state of the art”

**Expert interviews /  
literatur research**

**Qualitative  
pre-investigation**

**Interviews and/or  
focus groups  
with patients**

- Generating the relevant characteristics and dimensions
- Selecting the survey design

**Quantitative  
principal  
investigation**

- Selecting the rating scales and designing the questionnaire
  - Pre-test (optional)
  - Patients’ assessment of draft versions (main survey))

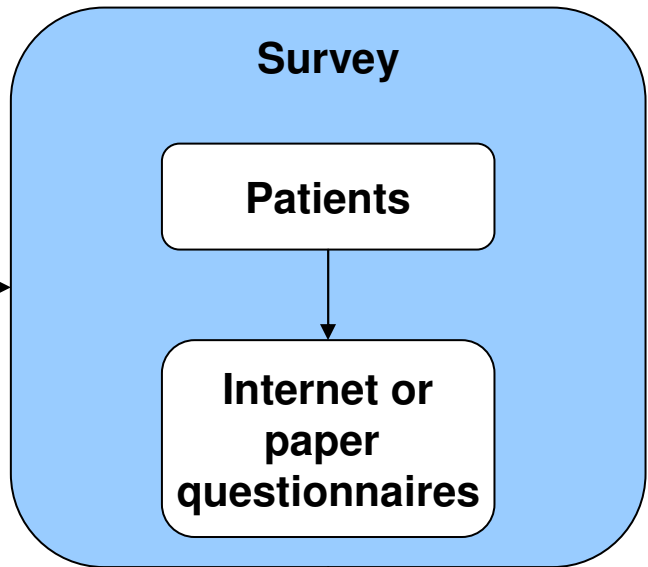

**Data analysis /  
evaluation**

**Final report**

- Collection and processing of data
- Estimate of benefits
- Segment / market analyses
- Recommendations for implementation
